# Supplementary material for: Self-assembly and charge carrier transport of solution-processed conjugated polymer monolayers on dielectric surfaces with controlled sub-nanometer roughness
Source: Royal Society of Chemistry journal article supplement (doi:10.1039/c6nr01082b), 2016-01-01
Supplement: c6nr01082b1.pdf [file c6nr01082b1.pdf]

Electronic supplementary information (ESI) for

**Self-assembly and charge carrier transport of solution-processed  
conjugated polymer monolayers on dielectric surfaces with controlled  
sub-nanometer roughness**

*Mengmeng Li<sup>a</sup>, Felix Hinkel<sup>a</sup>, Klaus Müllen<sup>a,\*</sup>, Wojciech Pisula<sup>a,b,\*</sup>*

<sup>a</sup> Max Planck Institute for Polymer Research, Ackermannweg 10, 55128 Mainz,  
Germany

<sup>b</sup> Department of Molecular Physics, Faculty of Chemistry, Lodz University of  
Technology, Zeromskiego 116, 90-924 Lodz, Poland

\*E-mail: [pisula@mpip-mainz.mpg.de](mailto:pisula@mpip-mainz.mpg.de); [muellen@mpip-mainz.mpg.de](mailto:muellen@mpip-mainz.mpg.de)

Table S1 The surface roughness of **S1-S4**.

| dielectric    | <b>S1</b> | <b>S2</b> | <b>S3</b> | <b>S4</b> |
|---------------|-----------|-----------|-----------|-----------|
| $R_{ms}$ (nm) | 0.19±0.01 | 0.27±0.03 | 0.30±0.02 | 0.39±0.04 |

Table S2 The average ( $\mu_{ave}$ ) and maximum mobilities ( $\mu_{max}$ ) of PCPDTBT monolayers on **S1-S4**. (unit:  $\text{cm}^2 \text{V}^{-1} \text{s}^{-1}$ )

| dielectric                       | <b>S1</b> | <b>S2</b> | <b>S3</b> | <b>S4</b> |
|----------------------------------|-----------|-----------|-----------|-----------|
| $\mu_{ave}$ ( $\times 10^{-4}$ ) | 5.08±0.67 | 3.65±1.34 | 3.40±0.59 | 1.01±0.23 |
| $\mu_{max}$ ( $\times 10^{-4}$ ) | 6.42      | 3.82      | 3.96      | 1.18      |

Table S3 The on/off ratio and threshold voltage of PCPDTBT monolayers on **S1-S4**.

| dielectric       | <b>S1</b> | <b>S2</b>        | <b>S3</b>        | <b>S4</b>        |
|------------------|-----------|------------------|------------------|------------------|
| $I_{on}/I_{off}$ | $10^3$    | $10^2 \sim 10^3$ | $10^3 \sim 10^4$ | $10^2 \sim 10^3$ |
| $V_{th}$ (V)     | -20~-15   | -5~0             | -25~-5           | -20~-10          |

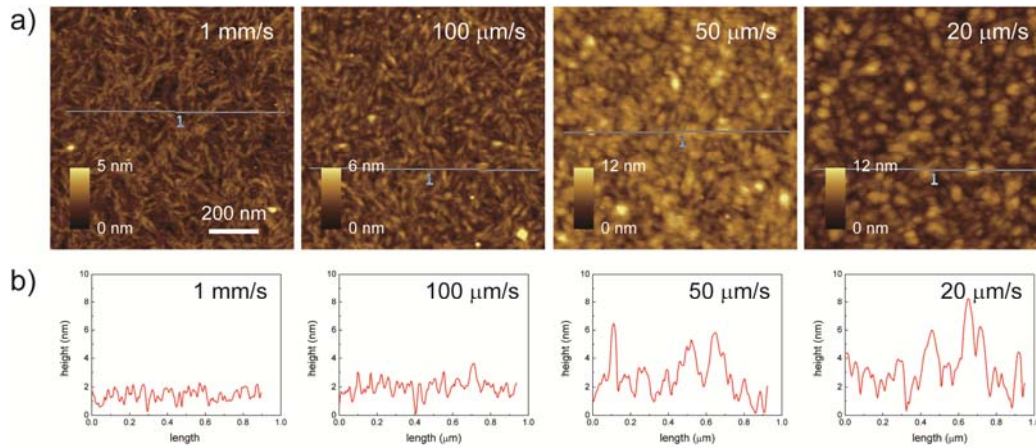

**Fig. S1** AFM images (a) and corresponding height plots (b) of PCPDTBT thin films deposited on bare  $\text{SiO}_2$  substrate at various dip-coating speeds. The maximum heights coincide with one, two, three and four polymer layers for 1 mm/s, 100  $\mu\text{m/s}$ , 50  $\mu\text{m/s}$  and 20  $\mu\text{m/s}$ , respectively.
